# Supplementary material for: The dual methyltransferase METTL13 targets N terminus and Lys55 of eEF1A and modulates codon-specific translation rates
Source: PubMed Central journal article supplement (PMC6109062; doi:10.1038/s41467-018-05646-y), 2018-08-24
Supplement: 41467_2018_5646_MOESM2_ESM.pdf [file 41467_2018_5646_MOESM2_ESM.pdf]

## Description of Additional Supplementary Files

**File Name:** Supplementary Data 1

**Description:** Summary of eEF1A N-terminal interactome data (Related to Fig 1b)

**File Name:** Supplementary Data 2

**Description:** Description of peptides for array based profiling of MT13-C activity (Related to Fig. 3b-c)

**File Name:** Supplementary Data 3

**Description:** Summary of proteome data from HAP-1 WT and METTL13 KO cells (Related to Supplementary Fig. 7b)

**File Name:** Supplementary Data 4

**Description:** MS Support for lysine methylation sites detected in HAP-1 WT and METTL13 KO cells (Related to Fig 5A)

**File Name:** Supplementary Data 5

**Description:** Summary of eEF1A WT interactome data (Related to Supplementary Fig 14)

**File Name:** Supplementary Data 6

**Description:** Summary of eEF1A-5KR interactome data (Related to Supplementary Fig 14)

**File Name:** Supplementary Data 7

**Description:** Plasmids generated for and used in the current study
